# Supplementary material
Source: publisher figshare collection journal article supplement (https://acs.figshare.com/ndownloader/files/21792750)
Supplement: Supplementary file 1 [file 21792750]

*Supporting Information*

Effect of Holding Temperature on Growth of Ruby Crystal  
Films via Molybdenum Trioxide Flux Evaporation–  
Solubility of Aluminum Oxide, Growth Rate, and Material  
Balance

*Shunsuke Ayuzawa<sup>†,‡</sup>, Sayaka Suzuki<sup>§</sup>, Miki Hidaka<sup>§</sup>, Shuji Oishi<sup>‡,§</sup>, Katsuya Teshima<sup>\*,‡,§,||</sup>*

<sup>†</sup>Department of Science and Technology, Graduate School of Medicine, Science and Technology, Shinshu University, 4-17-1 Wakasato, Nagano 380-8553, Japan

<sup>‡</sup>Nagano Prefecture Nanshin Institute of Technology, 8304-190 Minamiminowa, Nagano 399-4511, Japan

<sup>§</sup>Department of Materials Chemistry, Faculty of Engineering, Shinshu University, 4-17-1 Wakasato, Nagano 380-8553, Japan

<sup>||</sup> Research Initiative for Supra-Materials, Shinshu University, 4-17-1 Wakasato, Nagano 380-8553, Japan

\*Corresponding Author:

Katsuya Teshima

E-mail: [teshima@shinshu-u.ac.jp](mailto:teshima@shinshu-u.ac.jp)

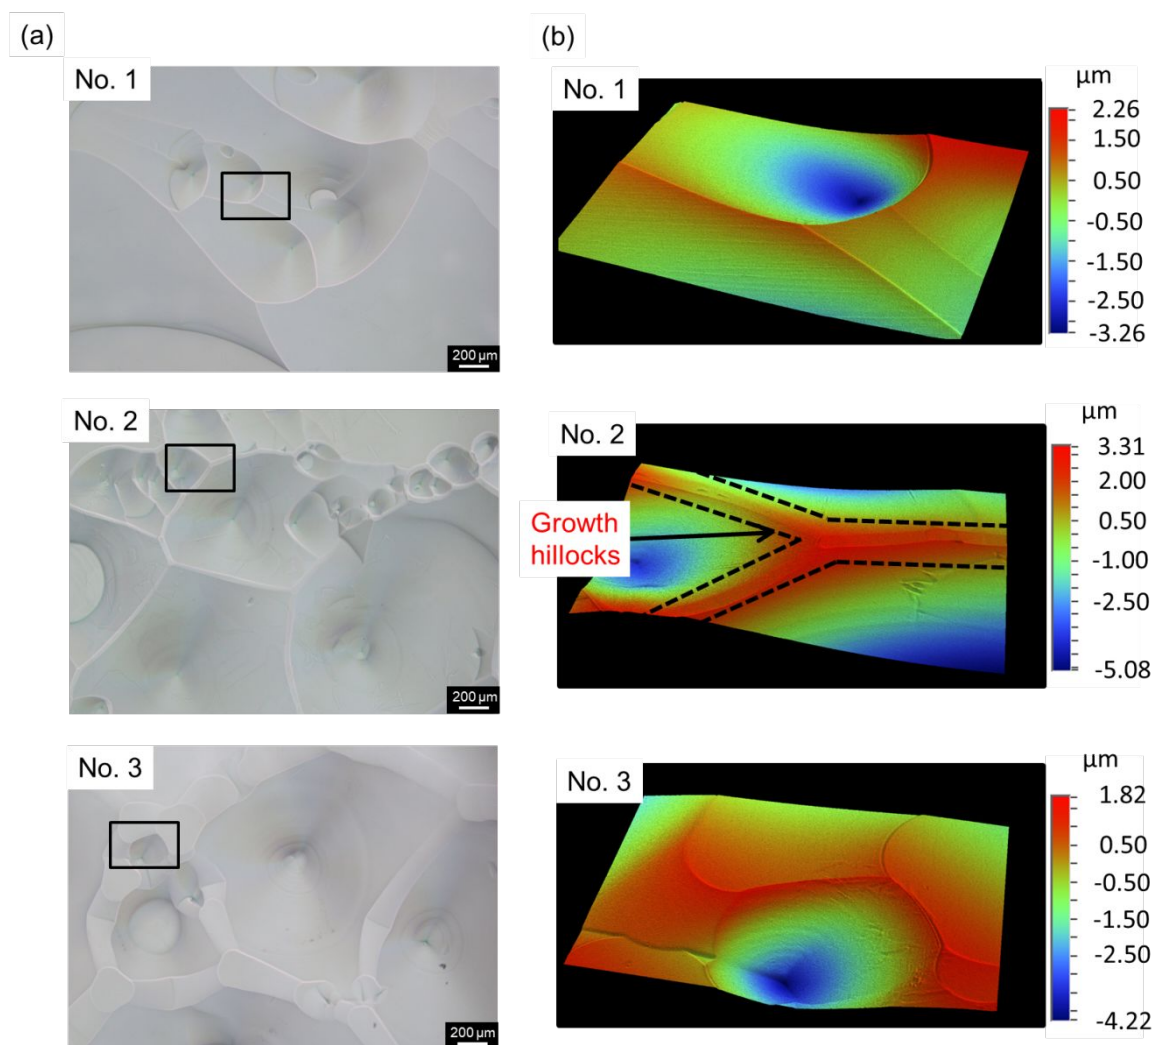

**Figure S1.** Photographs to judge the commencement of ruby crystal growth at 1050 °C. (a) Optical micrographs of the substrate surfaces obtained under the respective conditions. (b) 3D optical micrographs of the corresponding parts shown in (a).

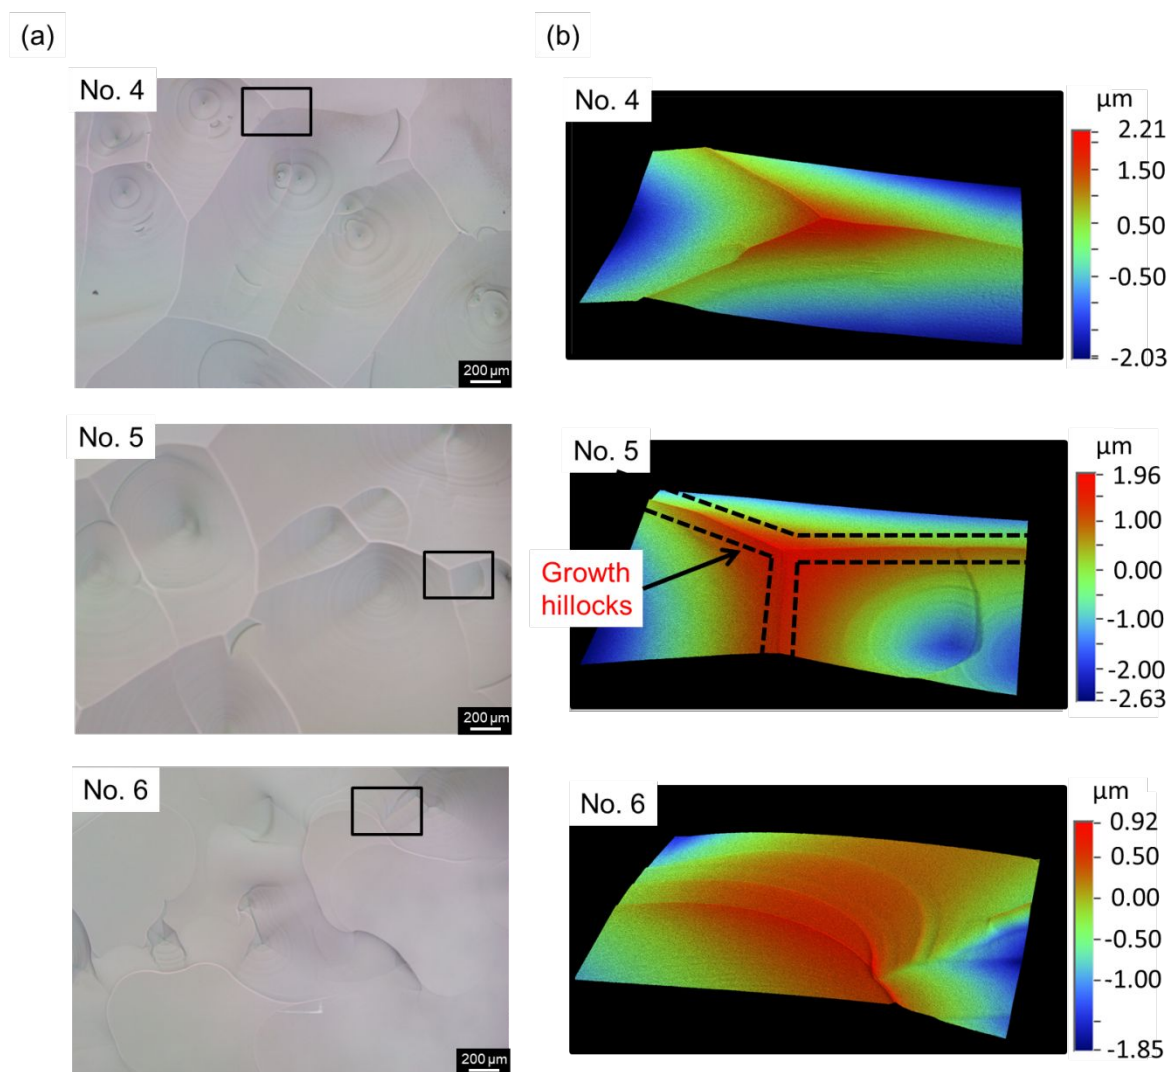

**Figure S2.** Photographs to judge the commencement of ruby crystal growth at 1150 °C. (a) Optical micrographs of the substrate surfaces obtained under the respective conditions. (b) 3D optical micrographs of the corresponding parts shown in (a).

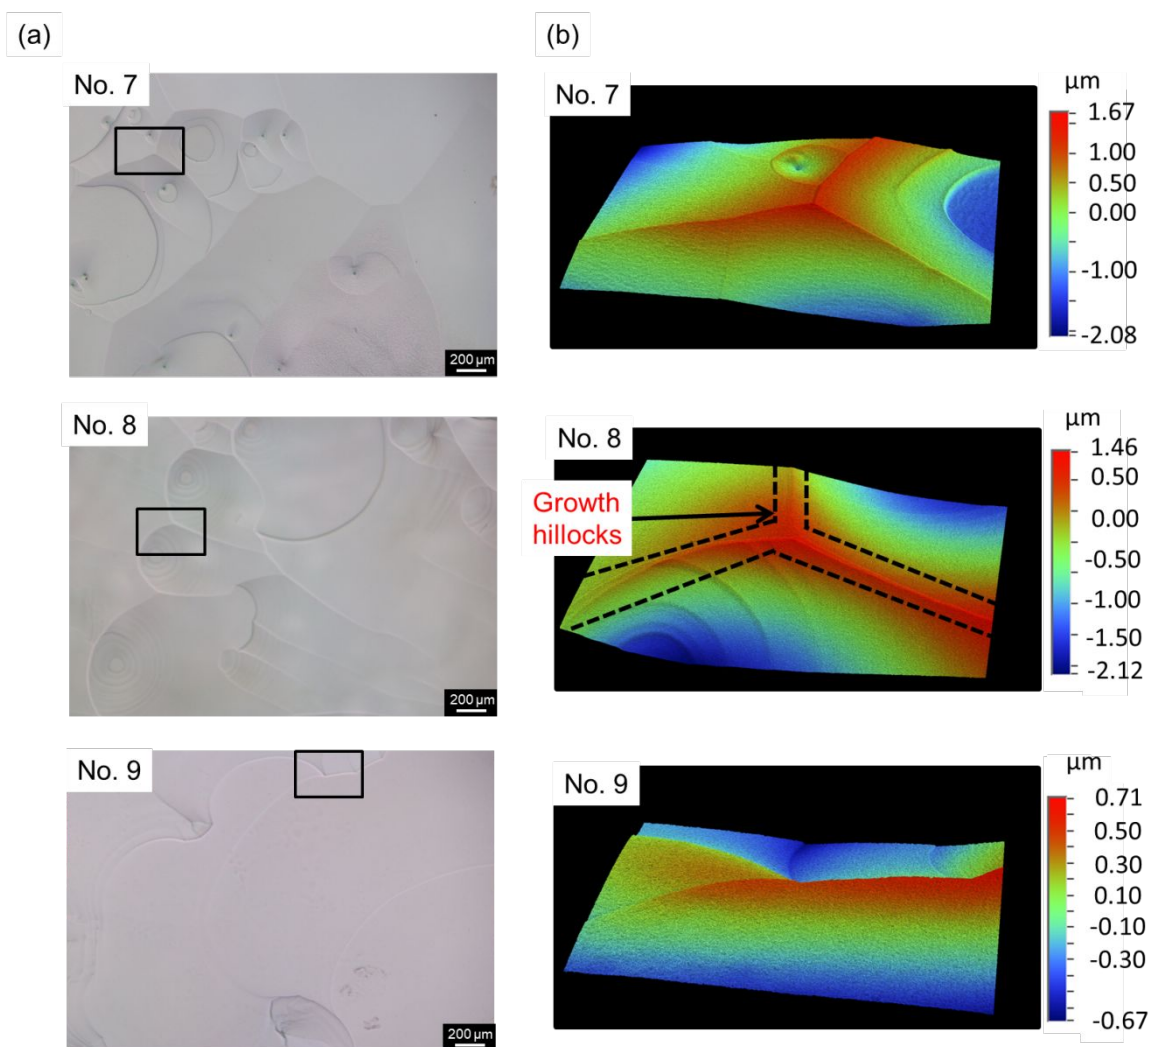

**Figure S3.** Photographs to judge the commencement of ruby crystal growth at 1200 °C. (a) Optical micrographs of the substrate surfaces obtained under the respective conditions. (b) 3D optical micrographs of the corresponding parts shown in (a).

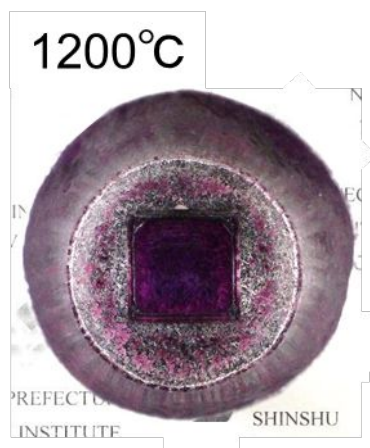

**Figure S4.** The inside of a crucible after the flux had evaporated completely at 1200 °C.
